# Supplementary material for: Peganum harmala Extract Has Antiamoebic Activity to Acanthamoeba triangularis Trophozoites and Changes Expression of Autophagy-Related Genes
Source: MDPI journal article supplement (doi:10.3390/pathogens10070842), 2021-07-04
Supplement: s1 [file s1]

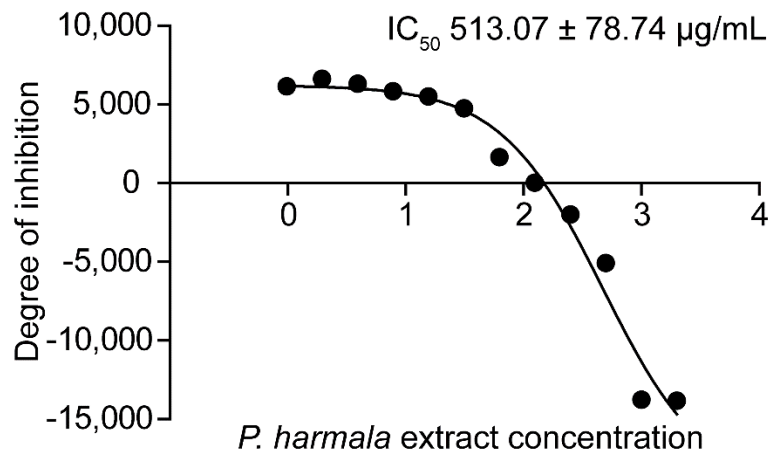

**Figure S1.** *P. harmala* extract  $IC_{50}$  against *A. triangularis* cysts. Cysts were treated with the *P. harmala* extract for 24 h. The parasite viability was analyzed by PrestoBlue<sup>®</sup> reagent. The  $IC_{50}$  was analyzed by the Prism 5 software and represented as mean  $\pm$  SD. The data obtained from 3 independent experiments.

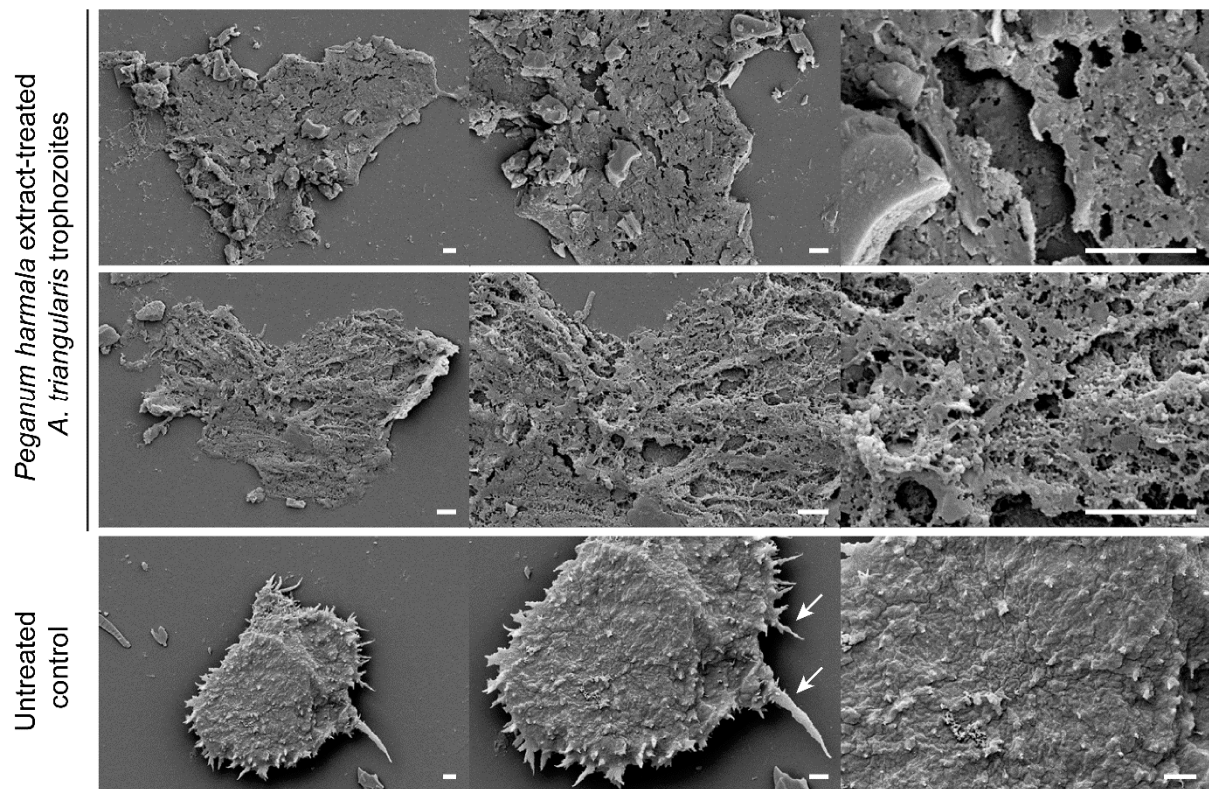

**Figure S2. Scanning electron microscopy imaging of *A. triangularis* trophozoites treated with *P. harmala* extract.** Cells were treated with 450  $\mu\text{g/mL}$  ( $2\times\text{IC}_{50}$ ) of the extract for 24 h in a 24-well plate. Cells were then fixed and processed for SEM. Arrows indicate acanthopodia. Scale bars 1  $\mu\text{m}$ .

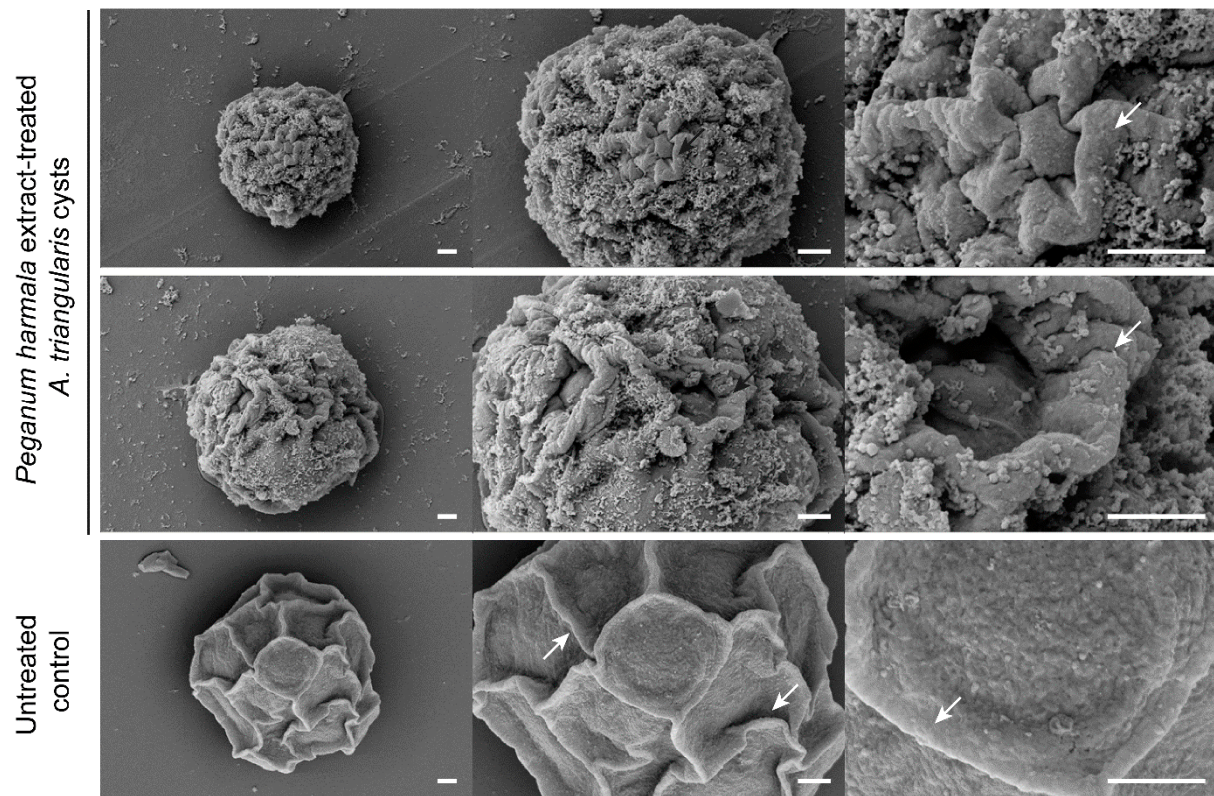

**Figure S3. Scanning electron microscopy imaging of *A. triangularis* cysts treated with *P. harmala* extract.** Cells were treated with 450  $\mu\text{g/mL}$  ( $2\times\text{IC}_{50}$ ) of the extract for 24 h in a 24-well plate. Cells were then fixed and processed for SEM. Arrows indicate a pronounced edge. Scale bars 1  $\mu\text{m}$ .

Untreated  
trophozoites

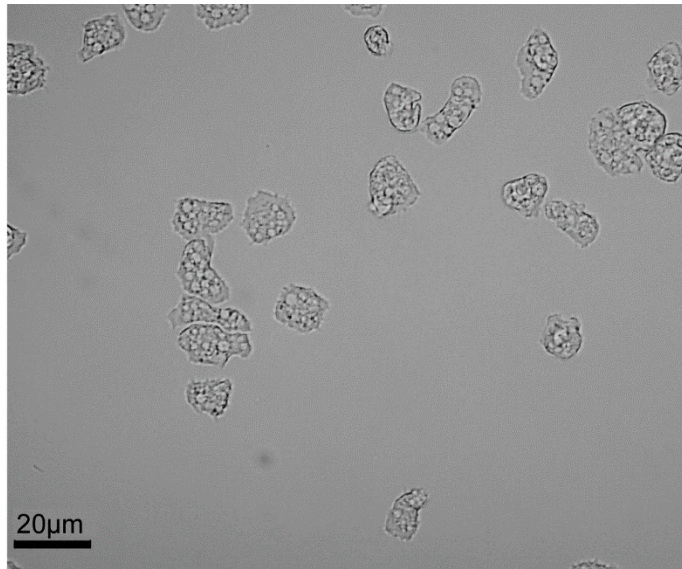

*P. harmala* extract  
-treated  
trophozoites

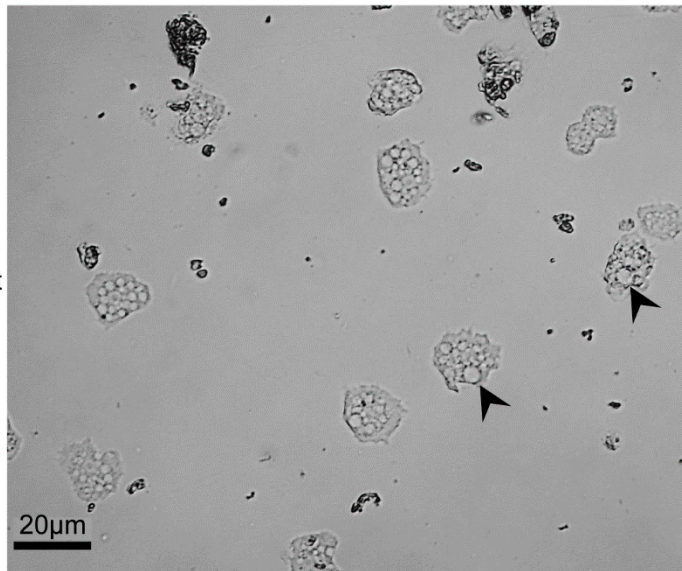

**Figure S4. Representative images of vacuolization in surviving *A. triangularis* trophozoites upon *P. harmala* extract treatment.** The parasites were treated with the extract at concentration of 225 μg/mL for 24 h. The surviving parasites containing vacuoles and/or enlarged vacuoles were analyzed. The enlarged vacuoles are indicated by black arrowhead. Scale bars 20 μm.

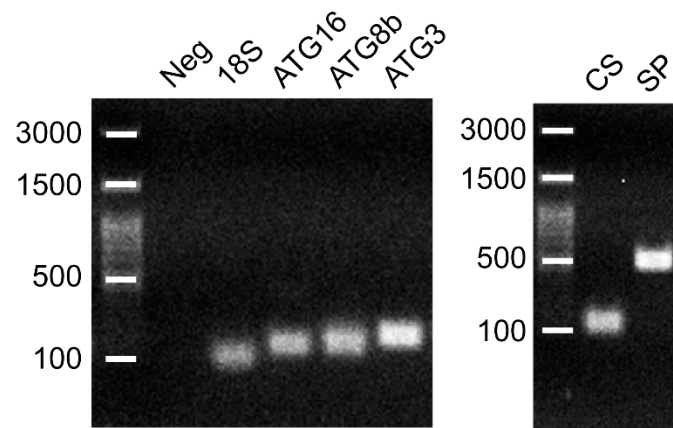

**Figure S5. Gel electrophoresis of PCR product.** Conventional PCR using primers specific to ATG genes, cellulose synthase (CS), serine proteinase (SP), including 18S rRNA was performed and the PCR product was run on 1.5% agarose gel. The first lane of each gel was a DNA ladder in bp. Neg is a negative control.

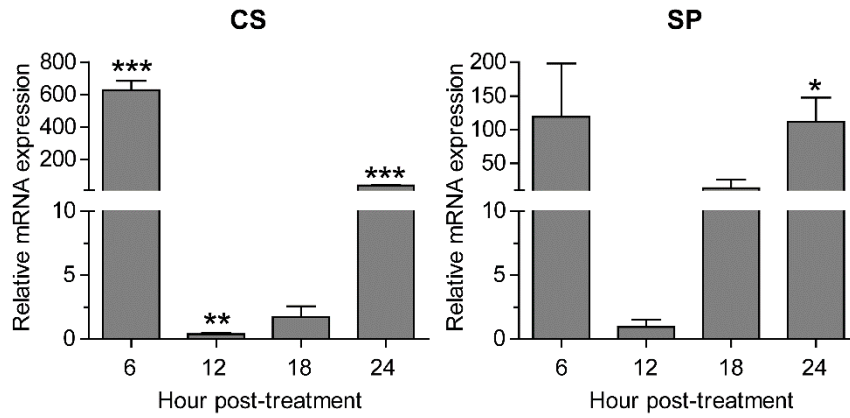

**Figure S6. Transcriptional expression of other encystation-related genes.** Expression level of cellulose synthase (CS) and serine proteinase (SP) mRNA was investigated. The cDNA samples were shared with autophagy-related genes analysis. 18S rRNA was used as internal normalization gene. The data were obtained from 3 independent experiments. Bar graphs showed mean  $\pm$  SEM. \*,  $p < 0.05$ ; \*\*,  $p < 0.01$ ; \*\*\*,  $p < 0.001$ .

**Table S1.** Effect of *Peganum harmala* seed extract in combination with chlorhexidine against *Acanthamoeba triangularis* trophozoite.

***P. harmala***

***extract***

**( $\mu\text{g/mL}$ )**

|            |                 |                |                |                |                |               |
|------------|-----------------|----------------|----------------|----------------|----------------|---------------|
| <b>512</b> | 4.0 $\pm$ 0     | 5.4 $\pm$ 2.3  | 5.4 $\pm$ 2.3  | 5.4 $\pm$ 2.3  | 6.7 $\pm$ 2.3  | 4.0 $\pm$ 4.0 |
| <b>256</b> | 28.3 $\pm$ 8.1  | 28.3 $\pm$ 8.1 | 22.9 $\pm$ 2.3 | 33.7 $\pm$ 4.6 | 21.6 $\pm$ 2.3 | 6.7 $\pm$ 4.6 |
| <b>128</b> | 56.7 $\pm$ 4.0  | 54.0 $\pm$ 2.3 | 47.2 $\pm$ 2.3 | 39.1 $\pm$ 2.3 | 36.4 $\pm$ 0   | 4.0 $\pm$ 4.0 |
| <b>64</b>  | 82.4 $\pm$ 2.3  | 71.6 $\pm$ 4.6 | 68.9 $\pm$ 4.0 | 55.4 $\pm$ 6.1 | 31.0 $\pm$ 2.3 | 4.0 $\pm$ 4.0 |
| <b>32</b>  | 85.1 $\pm$ 14.0 | 75.6 $\pm$ 2.3 | 60.8 $\pm$ 4.0 | 55.4 $\pm$ 2.3 | 33.7 $\pm$ 4.6 | 4.0 $\pm$ 0   |
| <b>0</b>   | 100.0 $\pm$ 0   | 77.0 $\pm$ 0   | 66.2 $\pm$ 9.3 | 52.7 $\pm$ 8.1 | 21.6 $\pm$ 2.3 | 4.0 $\pm$ 0   |

**0**

**1**

**2**

**4**

**8**

**16**

**Chlorhexidine ( $\mu\text{g/mL}$ )**

**Table S2.** List of primers for quantitative PCR.

| Gene                          | Genbank<br>Accession<br>No. | Forward (F)                  | Reverse (R)                  | <i>Acanthamoeba</i><br>spp. | References                                                  |
|-------------------------------|-----------------------------|------------------------------|------------------------------|-----------------------------|-------------------------------------------------------------|
| ATG16                         | FJ906697                    | 5'-AGCTTGACTTCCATCACGCTGA-3' | 5'-TGTTTGAGGTTGGCCCGAA-3'    | <i>A. castellanii</i>       | (Song <i>et al.</i> , 2012)                                 |
| ATG3                          | GU270859                    | 5'-GCGCACGTACGATATCTCCATC-3' | 5'-ATGAACACTTGGTTCGGCGTC-3'  | <i>A. castellanii</i>       | (Moon <i>et al.</i> , 2011)                                 |
| ATG8b                         | KC524507.1                  | 5'-CCGAGTTCCTGTGATCGTTGA-3'  | 5'-AGCTGTGTGACGGCAATATCG-3'  | <i>A. castellanii</i>       | (Moon <i>et al.</i> , 2013)                                 |
| Cellulose<br>synthase<br>(CS) | EDCBI66TR                   | 5'-TCATCTACATGTTCTGCGCCC-3'  | 5'-CGATCCAGTTGTTGAGCATGC-3'  | <i>A. castellanii</i>       | (Aqeel <i>et al.</i> , 2013;<br>Moon <i>et al.</i> , 2014)  |
| Serine<br>proteinase<br>(SP)  | EU365404                    | 5'-TCAAGGTGCTCGGATGCAAT-3'   | 5'-ATGTTAGCCACAGACTGCGTC-3'  | <i>A. healyi</i>            | (Moon <i>et al.</i> , 2008)                                 |
| 18S rRNA                      | -                           | 5'-TCCAATTTTCTGCCACCGAA-3'   | 5'-ATCATTACCCTAGTCCTCGCGC-3' | <i>A. castellanii</i>       | (Song <i>et al.</i> , 2012),<br>(Moon <i>et al.</i> , 2008) |



**Table S3.** *Acanthamoeba triangularis* DNA sequence by Sanger sequencing.

| Target gene<br>(Accession No.) | Primer | DNA sequence                                                                                                                                                                                         | Product<br>length<br>(bp). | % Identity <sup>a</sup> |
|--------------------------------|--------|------------------------------------------------------------------------------------------------------------------------------------------------------------------------------------------------------|----------------------------|-------------------------|
| <b>ATG16</b><br>(FJ906697)     | F      | 5'-TCCGGGGCCCTCTCCGGCTTACGCCCCGCCACCTCACAGAACCCTTCAAAGCTAACGAGAGT<br>CACGCCACACAGATGGAAGCTCGATCCTGTCCAACCTCAAGAGACAGCAGCCTCAAGATGC<br>TTGACATTCGGGCCAACCTCAAACAAA-3'                                 | 147                        | 97.10                   |
|                                | R      | 5'-AAAAGTTGAGCTGCTGTCTCTTGAGTTGGACAGGATCGAGCTTCCATCTGTGTGGCGTGA<br>CTCTCGTTAGCTTTGAAGGGTCTGTGAGGTGGCGGGCGTAGCGGAGAGGGGTACCCGGGC<br>TCAGCGTGATGGAAGTCAAG-3'                                           | 140                        | - <sup>b</sup>          |
| <b>ATG3</b><br>(GU270859)      | F      | 5'-AAAATACAGAACGCCCAAGGTGTGGCTGTTTGGCTACGACGAGGTACACCCTGCTTTGAC<br>CCCGTACCGCTCGGGTGGCCACCCGCAGACAAGGCAAAGCAACTGATTCTTCTTTGTGCC<br>CTCTATTTCTATCCGCGGCGTGTAGAATGGCAACGGCCTGACGCCGAACCAAGTGTTTCATA-3' | 181                        | 100.00                  |
|                                | R      | 5'-NTCTACGCCGCGGATAGAATAGAGGGCACAAAGAAGAATCAGTTGCTTTGCCTTGTCTGC<br>GGGTGGCCACCCGAGCGGTACGGGGTCAAAGCAGGGTGTACCTCGTCGTAGCCAAACAGC<br>CACACCTTGGGCGTCTGGTAGTACTTGTTCGTAGGTGATGGAGATATCGTACGTGCGCA-3'    | 178                        | 100.00                  |
| <b>ATG8b</b><br>(KC524507.1)   | F      | 5'-CAGGGACAGCTCTTCCGACTTTCCAGAGGAGTACGCCTTGCGCCTTGACCTATCCTCTC<br>TATCCATGCTGCTGAAAGTTGCTCTTCGGTTCTCGGCTCCTCGTGGATATGCCCTCTCCA<br>CCTATAGGC-3'                                                       | 129                        | - <sup>b</sup>          |
|                                | R      | 5'-CCCCNACTGCGGAAGGAACTTTCTTCAGCATCTGGATATGGGATCTACGTGCAAGTGCA<br>ACGCATACATTTTCTCTTAAATATCTCGAATAAGATCTCTCCCTCGTGCTCTTCTCCAA<br>TATCACGAGAACTCGGAC-3'                                               | 138                        | - <sup>b</sup>          |

<sup>a</sup> The DNA sequences were blasted against *A. castellanii* strain in NCBI database.

<sup>b</sup> No significant similarity found by NCBI-DNA blast (*A. castellanii* ATCC30011).

**Table S3 (Cont.).** *Acanthamoeba triangularis* DNA sequence by Sanger sequencing.

| Target gene<br>(Accession No.)               | Primer | DNA sequence                                                                                                                                                                                                                                                                                                                                                                                                                                                                                                              | Product<br>length<br>(bp). | % Identity <sup>a</sup> |
|----------------------------------------------|--------|---------------------------------------------------------------------------------------------------------------------------------------------------------------------------------------------------------------------------------------------------------------------------------------------------------------------------------------------------------------------------------------------------------------------------------------------------------------------------------------------------------------------------|----------------------------|-------------------------|
| <b>Cellulose<br/>synthase</b><br>(EDCBI66TR) | F      | 5'-ATCGCGAGGCGCCTGCCAGGCCAACGACCCGTTCAACACCAGCTCCTTCCTCTGGGTCTT<br>CCTGCCCTACCTCTGCTTCCGCATGCTCAACAACCTGGATCGA-3'                                                                                                                                                                                                                                                                                                                                                                                                         | 102                        | 96.97                   |
|                                              | R      | 5'-TCATCTACATGTTCTGCGCCCTGGTCTTCGTCTACTTCGGCGAGGCGCCCGCCAAGGCCA<br>ACGACCCGTCAACACCAGCTCCTCCTCTGGTCTCTGCCATTAGTTGTACCGGG-3'                                                                                                                                                                                                                                                                                                                                                                                               | 113                        | 96.88                   |
| <b>Serine<br/>proteinase</b><br>(EU365404)   | F      | 5'-GGANGAAGGGCTGTGCGCGGAGGCGATGAAGATGAAGATAATGATCAAGCTGCGCGGGTG<br>ACGTACCAAGAGACGTAGGCGCAGAGAAAGCCTTCCTTGGTTTCGCAGTATGCCAGGATG<br>TTCTCGATCTCGTCACCAAAGTCGAAGCCACCTTGGCGTCGACTTGGGCGGCGGTGGTG<br>GCGGGCGATGGTGCTTCACTCGTAGTCTTCGCGTCGGGTGCGGTACTCTTCCTAGGCCTC<br>TTTGCCCTTTGGGAAGAAGAAGACACGACATTCATAATAAATCCGTGAAAAAGAAGAAAAA<br>GAAGAAGTGCGTTCCCTCCAGTGGATGGAGCGGTTTACCTTTGGGCTACCGATGCCCTC<br>GCTCGTGTCTGCACGTCCATTTTATCTGTGTTTCGGTTGGTTCAGAAGCTCGTCGTCATC<br>GACGGTGGGCACCGAAGAAGCCGACGCAGTCTGTGGGCTAACATAAAC-3'     | 468                        | 91.80                   |
|                                              | R      | 5'-GTTTGGGCCCCGTCGGATGACGACGAGCTTCTGAACCAACCGAACACAGATAAAATGGACG<br>TGCAGGACACGAGCGAGGGCATCGGTAGCCCAAAGGTAAACCGCTCCATCCACTGGAGGG<br>GAACGCACTTCTTCTTTTTCTTCTTTTTCACGGATTTATTATGAATGTCGTGTCTTCTTC<br>TTCCCAAAGGCAAAGAGGCCTAGGAAGAGTACCGCACCCGACGCGAAGACTACGAGTGAA<br>GCACCATCGCCCGCCACCACCGCCGCCAAGTCGACGCCAAGGTGGGCTTCGACTTTGGT<br>GACGAGATCGAGAACATCCTGGGCATACTGCGAACCAAGGAAGGCTTTCTCTGCGCCTAC<br>GTCTCTTGGTACGTCACCCGCGCAGCTTGATCATTATCTTCATCTTCATCGCCTCCGCGC<br>ACAGCCCTCATTCTCCTATTCTTATTTTCATTGCATCCGAGCACCTTGAAA-3' | 470                        | 94.19                   |
| <b>18S rRNA</b>                              | F      | 5'-AATGGAATGGAATAGGACCTGTCTCCTATTTTCAGTTGGTTTTGGCAGCGCGAGGACTA<br>GGGTAATGATA-3'                                                                                                                                                                                                                                                                                                                                                                                                                                          | 71                         | 98.48                   |
|                                              | R      | 5'-TGAAATTAGGAAGGAACGGGTCCTATTCCATTATCCCATGCTAATGTATTCCGGTGGCAG<br>AAAATTGGAATAATAGGAC-3'                                                                                                                                                                                                                                                                                                                                                                                                                                 | 78                         | 92.75                   |

<sup>a</sup> The DNA sequences were blasted against *A. castellanii* strain in NCBI database.

<sup>b</sup> No significant similarity found by NCBI-DNA blast (*A. castellanii* ATCC30011).
